# Supplementary material
Source: Springer Nature journal article supplement (https://www.springermedizin.de/resource/supplementary/12939_2013_385_MOESM9_ESM.pdf/9551028)

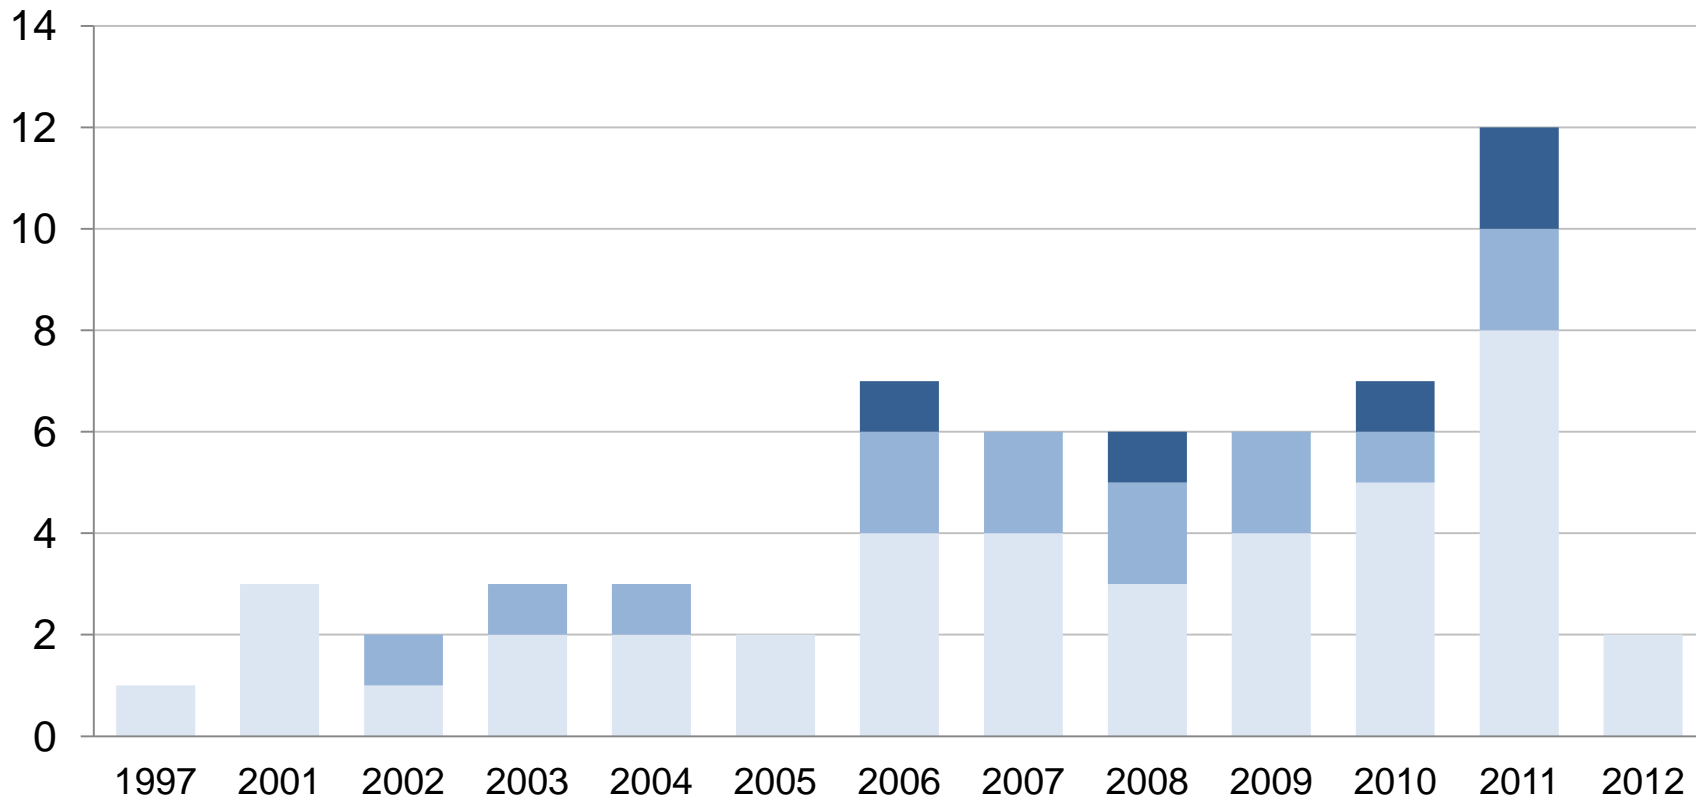

Supplement: MOESM9 [file 9551028]
